# Supplementary material for: Free thiol groups on poly(aspartamide) based hydrogels facilitate tooth-derived progenitor cell proliferation and differentiation
Source: PubMed Central journal article supplement (PMC6922333; doi:10.1371/journal.pone.0226363), 2019-12-19
Supplement: pone.0226363.s001.pdf [file pone.0226363.s001.pdf]

**Table S1: Constitution of the reaction mixtures**

| Sample name   | 25 w% PSI solution (mg) | DAB (mg) | CYS*2HCl (mg) | DBA (mg) | DMSO (mg) |
|---------------|-------------------------|----------|---------------|----------|-----------|
| DAB 1/20      | 600.0                   | 6.8      | -             | -        | 393.2     |
| CYS 1/20      | 600.0                   | -        | 17.4          | 20.0     | 362.6     |
| CYS-DAB 1/20  | 600.0                   | 3.4      | 8.7           | 10.0     | 377.9     |
| CYSE-DAB 1/20 | 600.0                   | 6.8      | 17.4          | 20.0     | 355.8     |
| DAB 1/40      | 600.0                   | 3.4      | -             | -        | 396.6     |
| CYS 1/40      | 600.0                   | -        | 8.7           | 10.0     | 381.2     |
| CYS-DAB 1/40  | 600.0                   | 1.7      | 4.4           | 5.0      | 388.9     |
| CYSE-DAB 1/40 | 600.0                   | 3.4      | 8.7           | 10.0     | 377.9     |

DBA: Dibutylamine

DMSO: Dimethyl sulfoxide
