# Supplementary material for: Free thiol groups on poly(aspartamide) based hydrogels facilitate tooth-derived progenitor cell proliferation and differentiation
Source: PubMed Central journal article supplement (PMC6922333; doi:10.1371/journal.pone.0226363), 2019-12-19
Supplement: pone.0226363.s002.pdf [file pone.0226363.s002.pdf]

**Table S2: Constitution of the reaction mixtures**

| Sample name            | 25 w% PSI solution (mg) | DAB (mg) | CYSE (mg) | DMSO (mg) |
|------------------------|-------------------------|----------|-----------|-----------|
| CYSE <sub>(1/2)</sub>  | 600.0                   | 6.8      | 59.5      | 333.7     |
| CYSE <sub>(1/5)</sub>  | 600.0                   | 6.8      | 23.8      | 369.8     |
| CYSE <sub>(1/10)</sub> | 600.0                   | 6.8      | 11.9      | 381.2     |
| CYSE <sub>(1/20)</sub> | 600.0                   | 6.8      | 5.9       | 387.2     |
| CYSE <sub>(1/40)</sub> | 600.0                   | 6.8      | 2.9       | 390.2     |
| CYSE <sub>(1/80)</sub> | 600.0                   | 6.8      | 1.5       | 391.7     |
